# Supplementary material
Source: PubMed Central journal article supplement (PMC5950999)
Supplement: Supplementary_material_026.pdf [file Supplementary_material_026.pdf]

## Supplementary material

### Appendix 1: Radar Plot Geometry

$X$  = meter blood glucose result

$Y$  = Laboratory comparator (eg, YSI) result

Min = minimum value of YSI or other laboratory comparator result

Max = maximum value of YSI or other laboratory comparator result

Mid = (Min + Max) / 2

$r$  = Max – Min = range of laboratory values

$$R = \begin{cases} 100 * \frac{X - Y}{Y}, & Y \geq 100 \text{ mg/dL} \\ X - Y, & Y < 100 \text{ mg/dL} \end{cases}$$

Let  $\theta_{max} = 2\pi$

$\theta_{min} = \pi$

$$b_1 = \begin{cases} \frac{\pi}{r} & R < 0 \\ -\frac{\pi}{r} & R \geq 0 \end{cases}$$

$b_0 = \pi - b_1 \text{Min}$

$\theta = \text{mod}(b_0 + b_1 Y, 2\pi)$  (ie, principle value of  $\theta$ , modulus =  $2\pi$ ).

The polar coordinates of every pair  $(X, Y)$  are  $(|R|, \theta)$ . To translate this so the radar plot can be constructed using software that makes plots in an  $(x, y)$  plane, use:

$$x = |R|\cos(\theta) \text{ and } y = |R|\sin(\theta)$$

Note that if  $|R| \geq 35$ , the radius,  $|R|$ , is set to 35
